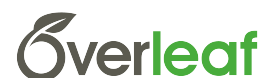

# Linking FANTOM5 CAGE peaks to annotations with CAGEscan

Nicolas Bertin<sup>1,2,3</sup>, Mickaël Mendez<sup>1,2,4</sup>, Akira Hasegawa<sup>1,2</sup>,  
Marina Lizio<sup>1,2</sup>, Imad Abugessaisa<sup>1,2</sup>, Jessica Severin<sup>1,2</sup>,  
Mizuho Sakai-Ohno<sup>1,2</sup>, Timo Lassmann<sup>1,2,5</sup>, Takeya Kasusawa<sup>1</sup>,  
Hideya Kawaji<sup>1,2,6</sup>, Yoshihide Hayashizaki<sup>1,2,6</sup>, Alistair R. R. Forrest<sup>1,2,7</sup>,  
Piero Carninci<sup>1,2</sup>, Charles Plessy<sup>1,2\*</sup>

April 11, 2017

1. RIKEN Center for Life Science Technologies, Division of Genomics Technologies, Japan; 2. RIKEN Omics Science Center, Japan; 3. Present address: Human Longevity Singapore Pte. Ltd., Singapore; 4. Present address: Department of Computer Science, University of Toronto, Canada; 5. Present address: Telethon Kids Institute, The University of Western Australia, Australia; 6. RIKEN Preventive Medicine and Diagnosis Innovation Program, Japan; 7. Present address: Harry Perkins Institute of Medical Research, QEII Medical Centre and Centre for Medical Research, the University of Western Australia, Australia; \*Corresponding author(s): Charles Plessy (plessy@riken.jp).

## Abstract

1  
2  
3  
4  
5  
6  
7  
8  
9  
10  
11  
12  
13

The FANTOM5 expression atlas is a quantitative measurement of the activity of nearly 200,000 promoter regions across nearly 2,000 different human primary cells, tissue types and cell lines. Generation of this atlas was made possible by the use of CAGE, an experimental approach to localise transcription start sites at single-nucleotide resolution by sequencing the 5' ends of capped RNAs after their conversion to cDNAs. While 50% of CAGE-defined promoter regions could be confidently associated to adjacent transcriptional units, nearly 100,000 promoter regions remained gene-orphan. To address this, we used the CAGEscan method, in which random-primed 5'-cDNAs are paired-end sequenced. Pairs starting in the same region are assembled in transcript models called CAGEscan clusters. Here, we present the production and quality control of CAGEscan libraries from 56 FANTOM5 RNA sources, which enhances the FANTOM5 expression atlas by providing experimental evidence associating core promoter regions with their cognate transcripts.

## 14 Background & Summary

15 CAGE (Cap Analysis Gene Expression, [1]) is the method of choice for studying gene regulation  
16 through quantitative analysis of transcription start sites (TSS, sequence ontology term 0000315)  
17 [2]. By sequencing the 5' end of cDNA-converted capped RNAs, CAGE enables the identification  
18 of core promoter regions and 5' end transcriptional activity. Large scale application of CAGE by

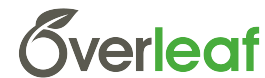

19 the FANTOM consortium to nearly 2,000 human RNA sources including primary cells, whole-tissue  
20 extracts and cell lines [3, 4] identified nearly 200,000 core promoter regions active within the human  
21 genome [5].

22 Although CAGE enables the location of TSS at a single nucleotide resolution, the determination  
23 of their connection to downstream known gene structures or to independent novel RNAs is limited  
24 to positional computational inference and low-throughput gene-by-gene experimental validations.  
25 Half (101,893/201,802) of the FANTOM5's active core promoter regions did not co-localize within  
26 a reasonable distance with 5' termini of annotated gene models. To experimentally associate these  
27 orphan core promoter regions to transcriptional units, we employed *CAGEscan* [6], an approach  
28 in which paired-end sequencing of the 5' end of cDNA-converted capped RNAs with their cognate  
29 randomly priming sites enables the unequivocal association of individual TSS to transcripts exons.  
30 In a previous project, focused on analysing the transcriptome of Purkinje neurons in rat [7], the  
31 *CAGEscan* approach annotated 43 % of the core promoters active in rat's Purkinje neurons that  
32 we detected but had no by direct overlap with Ensembl transcripts.

33 Here, we selected 56 RNA sources which upon FANTOM5 CAGE profiling revealed the greatest  
34 levels of transcriptome diversity and prepared individual *CAGEscan* libraries, with 6 of these 56  
35 RNA sources prepared in duplicate (see Table 1). Using the FANTOM5 core promoter atlas as  
36 seed, we clustered the *CAGEscan* paired-end reads in a collection of 112,315 models called *CAGEs-*  
37 *can clusters*. To de-orphanise FANTOM5 promoters, we intersected the *CAGEscan* clusters with  
38 GENCODE 18 gene models. Of the 85 % that intersected, 33,632 clusters had no annotation in  
39 FANTOM5, thus revealing novel and alternative promoters to known genes. We made these data  
40 available along with the FANTOM5 CAGE atlas data, as well as ready for manual inspection and  
41 analysis via the ZENBU genome browser [8] (see Figure 1 and Data Citation 1).

| Source.Name | Description | Unextracted                                                                 | Artefacts | rDNA   | Non_aligned | Non_proper | Duplicates | Promoter | Exon   | Non_annotated |
|-------------|-------------|-----------------------------------------------------------------------------|-----------|--------|-------------|------------|------------|----------|--------|---------------|
| NCig10013   | 10002-101A5 | SABiosciences XpressRef Human Universal Total RNA, pool1                    | 865232    | 53578  | 8620490     | 303381     | 336125     | 352035   | 557012 | 978157        |
| NCig10014   | 10012-101C3 | brain, adult, pool1                                                         | 789460    | 56053  | 3579617     | 156712     | 499657     | 1967826  | 479841 | 1007678       |
| NCig10015   | 10016-101C7 | heart, adult, pool1                                                         | 657065    | 67493  | 12680315    | 189587     | 360818     | 1791722  | 341589 | 679820        |
| NCig10016   | 10026-101D8 | testis, adult, pool1                                                        | 735402    | 56663  | 8828467     | 229250     | 357108     | 761921   | 321059 | 575393        |
| NCig10017   | 10030-101E3 | retina, adult, pool1                                                        | 983120    | 49209  | 2016040     | 91931      | 396226     | 1395594  | 341442 | 574800        |
| NCig10018   | 12110-116A4 | Smooth Muscle Cells - Aortic, donor0                                        | 636805    | 76008  | 14079255    | 126255     | 163413     | 505347   | 152188 | 219216        |
| NCig10019   | 12176-128I7 | Whole blood (riboPURE), donor090325, donation1                              | 745633    | 59630  | 5626776     | 168819     | 557490     | 1749239  | 502772 | 701914        |
| NCig10020   | 10019-101D1 | lung, adult, pool1                                                          | 853743    | 90406  | 8943567     | 141998     | 347985     | 819745   | 309787 | 599126        |
| NCig10021   | 10022-101D4 | prostate, adult, pool1                                                      | 746116    | 64413  | 6095769     | 167516     | 486536     | 1152553  | 366192 | 716651        |
| NCig10022   | 10025-101D7 | spleen, adult, pool1                                                        | 852309    | 62976  | 3130575     | 143638     | 431102     | 1038248  | 402237 | 785577        |
| NCig10023   | 10150-102I6 | medial frontal gyrus, adult, donor10252                                     | 960285    | 25800  | 467916      | 81388      | 389764     | 534385   | 224651 | 506845        |
| NCig10024   | 10151-102I7 | amygdala, adult, donor10252                                                 | 858652    | 33503  | 1112179     | 112044     | 450492     | 801134   | 321988 | 702445        |
| NCig10025   | 10153-102I9 | hippocampus, adult, donor10252                                              | 892716    | 32233  | 861081      | 80184      | 360888     | 643485   | 241503 | 530452        |
| NCig10026   | 10154-103A1 | thalamus, adult, donor10252                                                 | 817751    | 35872  | 2262386     | 95945      | 505911     | 1296220  | 377511 | 716479        |
| NCig10027   | 10155-103A2 | medulla oblongata, adult, donor10252                                        | 1397247   | 78367  | 2366286     | 132873     | 610522     | 1541331  | 446644 | 906737        |
| NCig10028   | 10157-103A4 | parietal lobe, adult, donor10252                                            | 936084    | 71291  | 1471269     | 153886     | 694447     | 1387954  | 463355 | 1096767       |
| NCig10029   | 10158-103A5 | substantia nigra, adult, donor10252                                         | 1078146   | 59251  | 2360698     | 85562      | 425712     | 1188939  | 344322 | 602764        |
| NCig10030   | 10159-103A6 | spinal cord, adult, donor10252                                              | 888981    | 79200  | 2801018     | 116324     | 594991     | 1353570  | 442320 | 903764        |
| NCig10031   | 10160-103A7 | pineal gland, adult, donor10252                                             | 1011960   | 65055  | 1343792     | 103948     | 545004     | 944389   | 348323 | 744959        |
| NCig10032   | 10161-103A8 | globus pallidus, adult, donor10252                                          | 821077    | 80387  | 4015936     | 130251     | 673588     | 1632249  | 496685 | 916587        |
| NCig10033   | 10162-103A9 | pituitary gland, adult, donor10252                                          | 970964    | 49755  | 1932932     | 124341     | 563707     | 1591606  | 451105 | 847858        |
| NCig10034   | 10163-103B1 | occipital cortex, adult, donor10252                                         | 905254    | 44694  | 1193623     | 136650     | 708731     | 1223230  | 432869 | 1030595       |
| NCig10035   | 10164-103B2 | caudate nucleus, adult, donor10252                                          | 1102408   | 38186  | 869711      | 109813     | 476042     | 1310808  | 346046 | 754780        |
| NCig10036   | 10165-103B3 | locus coeruleus, adult, donor10252                                          | 1045453   | 49711  | 1251961     | 97962      | 454490     | 1173365  | 330395 | 729525        |
| NCig10037   | 10166-103B4 | cerebellum, adult, donor10252                                               | 1095992   | 54415  | 368370      | 62650      | 519173     | 650125   | 254418 | 492016        |
| NCig10038   | 11207-116A1 | Endothelial Cells - Aortic, donor0                                          | 718897    | 98322  | 12128937    | 142908     | 291064     | 820844   | 298247 | 455971        |
| NCig10039   | 11222-116B7 | Fibroblast - Gingival, donor4 (GFH2)                                        | 885111    | 167833 | 2081881     | 108043     | 284519     | 1080129  | 346774 | 547431        |
| NCig10040   | 11224-116B9 | CD14+ Monocytes, donor1                                                     | 651017    | 101461 | 4297440     | 152438     | 540035     | 1268085  | 510000 | 645877        |
| NCig10041   | 11229-116C5 | CD14+ monocyte derived endothelial progenitor cells, donor1                 | 1032309   | 242145 | 3950479     | 190791     | 539087     | 1666613  | 561795 | 835546        |
| NCig10042   | 11245-116E3 | Fibroblast - Aortic Adventitial, donor1                                     | 735498    | 828670 | 3376827     | 198604     | 517858     | 2135913  | 652705 | 710317        |
| NCig10043   | 11246-116E4 | Intestinal epithelial cells (polarized), donor1                             | 919980    | 392820 | 1056095     | 120525     | 433407     | 2003503  | 513395 | 536761        |
| NCig10044   | 11247-116E5 | Mesothelial Cells, donor1                                                   | 870202    | 443481 | 1547197     | 127726     | 418103     | 2291855  | 516801 | 516012        |
| NCig10045   | 11248-116E6 | Anulus Pulposus Cell, donor1                                                | 673123    | 467283 | 4733836     | 191255     | 418230     | 1674689  | 474236 | 571373        |
| NCig10046   | 11249-116E7 | Pancreatic stromal cells, donor1                                            | 895678    | 266841 | 1598919     | 129096     | 447633     | 1839323  | 563482 | 606168        |
| NCig10047   | 11256-116F5 | Small Airway Epithelial Cells, donor1                                       | 762215    | 197286 | 3113793     | 175723     | 506591     | 2330196  | 629638 | 801987        |
| NCig10048   | 11273-116H4 | Mammary Epithelial Cell, donor1                                             | 890533    | 198834 | 4561811     | 208742     | 497865     | 2025351  | 497139 | 721321        |
| NCig10049   | 11278-116H9 | Placental Epithelial Cells, donor1                                          | 523668    | 434079 | 7019440     | 196493     | 358154     | 1908353  | 304347 | 296384        |
| NCig10050   | 11282-116I4 | Skeletal muscle cells differentiated into Myotubes - multinucleated, donor1 | 825574    | 278816 | 3852864     | 174167     | 447392     | 2002086  | 521214 | 534883        |
| NCig10051   | 11468-119C1 | Preadipocyte - omental, donor1                                              | 863018    | 244070 | 1743473     | 94850      | 257299     | 790493   | 304494 | 524536        |
| NCig10052   | 11487-119E2 | Mast cell - stimulated, donor1                                              | 1047459   | 53428  | 390687      | 86272      | 312008     | 1219897  | 244001 | 294922        |
| NCig10053   | 10411-106B6 | renal cell carcinoma cell line:OS-RC-2                                      | 774316    | 209703 | 2297666     | 117997     | 1058325    | 387862   | 580214 | 1057849       |
| NCig10054   | 10412-106B7 | malignant trichilemmal cyst cell line:DJM-1                                 | 728347    | 139130 | 3031554     | 164712     | 630434     | 2045672  | 648552 | 895267        |
| NCig10055   | 10414-106B9 | maxillary sinus tumor cell line:HSQ-89                                      | 857517    | 135611 | 2250778     | 123989     | 579817     | 1951209  | 498578 | 697019        |
| NCig10056   | 10431-106D8 | epidermoid carcinoma cell line:Ca Ski                                       | 1071422   | 146593 | 982637      | 87543      | 343508     | 859004   | 378966 | 452570        |
| NCig10057   | 10436-106E4 | signet ring carcinoma cell line:Kato III                                    | 840579    | 145687 | 3244444     | 137763     | 512628     | 1657263  | 503623 | 614540        |
| NCig10058   | 10442-106F1 | schwannoma cell line:HS-PSS                                                 | 941029    | 176159 | 1799562     | 134668     | 519866     | 1659980  | 589180 | 732623        |
| NCig10059   | 10444-106F3 | glioblastoma cell line:A172                                                 | 861701    | 175094 | 2804921     | 186736     | 495954     | 1209931  | 520670 | 712755        |
| NCig10060   | 10454-106G4 | chronic myelogenous leukemia cell line:K562                                 | 1045797   | 109272 | 645627      | 70593      | 363272     | 675740   | 342295 | 400380        |
| NCig10061   | 10464-106H5 | acute lymphoblastic leukemia (T-ALL) cell line:Jurkat                       | 869111    | 131089 | 2562674     | 178216     | 687478     | 1748129  | 774916 | 819425        |
| NCig10062   | 10508-107D4 | neuroblastoma cell line:CHP-134, tech_rep1                                  | 962974    | 148947 | 278618      | 57421      | 405741     | 662738   | 258098 | 391938        |
| NCig10063   | 10552-107I3 | cervical cancer cell line:D98-AH2, tech_rep1                                | 1005845   | 156179 | 421514      | 70319      | 310350     | 1186016  | 271445 | 368888        |
| NCig10064   | 10558-107I9 | osteosarcoma cell line:HS-Os-1, tech_rep1                                   | 983856    | 182894 | 548737      | 80879      | 357116     | 711651   | 286493 | 395130        |
| NCig10065   | 10410-106B5 | extraskeletal myxoid chondrosarcoma cell line:H-EMC-SS, tech_rep1           | 928677    | 138036 | 393526      | 64950      | 343707     | 582912   | 220600 | 400189        |
| NCig10066   | 10441-106E9 | synovial sarcoma cell line:HS-SY-II, tech_rep1                              | 844408    | 197018 | 574814      | 57821      | 348974     | 523331   | 235006 | 375904        |
| NCig10067   | 10474-106I6 | myeloma cell line:PCM6, tech_rep1                                           | 810459    | 186856 | 755594      | 71301      | 358371     | 807453   | 278280 | 416507        |
| NCig10068   | 10424-106D1 | spleen lymphoma with villous lymphocytes cell line:SLVL                     | 852283    | 163002 | 455663      | 80461      | 376376     | 969585   | 280831 | 377707        |
| NCig10126   | 10508-107D4 | neuroblastoma cell line:CHP-134, tech_rep2                                  | 995795    | 48625  | 550450      | 63938      | 396327     | 701319   | 298112 | 438554        |
| NCig10127   | 10552-107I3 | cervical cancer cell line:D98-AH2, tech_rep2                                | 1015542   | 60740  | 646950      | 64609      | 304041     | 930823   | 243837 | 338193        |
| NCig10128   | 10558-107I9 | osteosarcoma cell line:HS-Os-1, tech_rep2                                   | 968282    | 75235  | 865891      | 76828      | 336463     | 737523   | 296891 | 409283        |
| NCig10129   | 10410-106B5 | extraskeletal myxoid chondrosarcoma cell line:H-EMC-SS, tech_rep2           | 822752    | 40614  | 436600      | 112425     | 377956     | 276992   | 152854 | 276872        |
| NCig10130   | 10441-106E9 | synovial sarcoma cell line:HS-SY-II, tech_rep2                              | 726773    | 64905  | 633633      | 81424      | 473478     | 240861   | 160678 | 250046        |
| NCig10131   | 10474-106I6 | myeloma cell line:PCM6, tech_rep2                                           | 720124    | 60988  | 898043      | 78483      | 322369     | 566406   | 231781 | 346042        |

Table 1: Summary of the libraries prepared. The RNA identifier (Source.Name) can be searched in the FANTOM5 SSTAR database [9, 10]. The RNA samples are also described in the SDRF files distributed alongside the FASTQ sequences and alignments, as well as the raw alignment statistics.

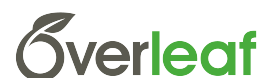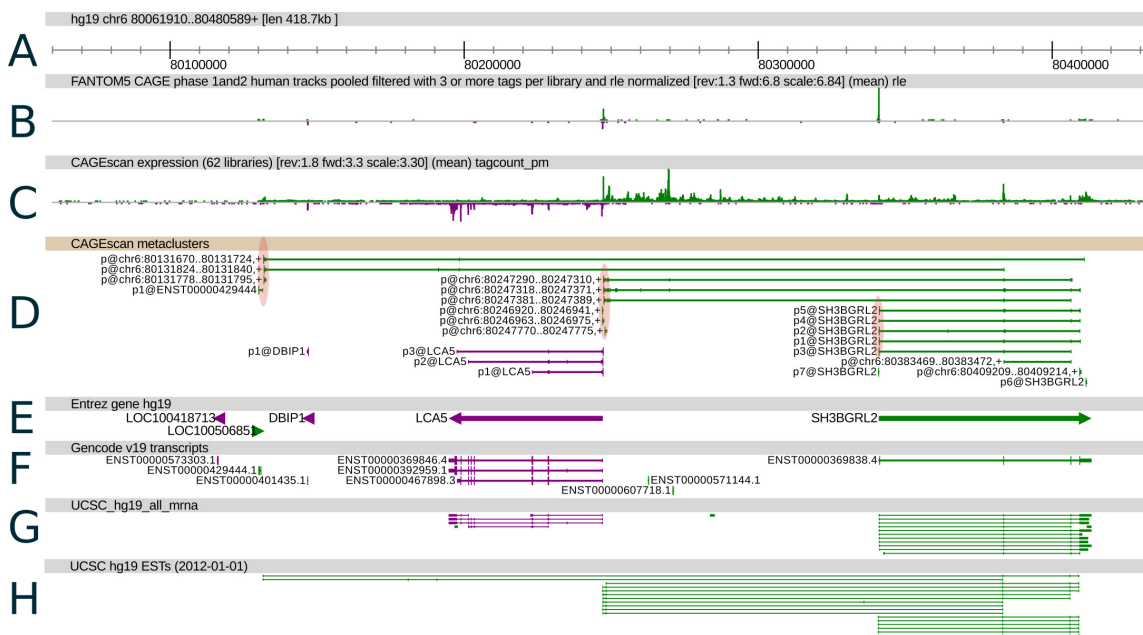

Figure 1: CAGEScan clusters revealing new promoters for the SH3BGRL2 gene. Features on the plus and minus strand are displayed in green and purple respectively. Promoter regions of interest are highlighted with ellipses in track D. A: Genomic coordinates. B: FANTOM5 CAGE signal as a quantitative histogram. C: CAGEScan CAGE signal. D: CAGEScan meta-clusters, combining pairs for all libraries. The name of the seed CAGE peak is indicated on the left of each cluster. E: NCBI Gene bodies. F: GENCODE 19 annotations. G: GenBank mRNA sequences. H: EST sequences supporting the CAGEScan clusters.

## 42 Methods

43 All human samples used in the project were either exempted material (available in public collections  
 44 or commercially available), or provided under informed consent. All non-exempt material is covered  
 45 under RIKEN Yokohama Ethics applications (H17-34 and H21-14). The CAGEScan libraries were  
 46 prepared as described earlier [11]. In brief, 500 ng of RNA were reverse-transcribed in presence of  
 47 random primers and template-switching oligonucleotides, amplified by PCR and sequenced paired-  
 48 end ( $2 \times 36$  nt) on Illumina GAIIX sequencers, one sample per lane. The barcode sequence GCTATA,  
 49 present in every sample, acted as the spacer that we introduced in [12] to decrease the amount  
 50 of strand-invasion artifacts. The paired-end sequences were then processed with the MOIRAI  
 51 workflow system [13], with a template implementing the workflow OP-WORKFLOW-CAGEScan-  
 52 FANTOM5-v1.0, described below and in Figure 2.

53 For each pair, the first (CAGE) and second (CAGEScan) reads in FASTQ format were demul-  
 54 tiplexed. The first 9 bases of the CAGE reads were trimmed as they contain the sample barcode  
 55 and the template-switching linker. CAGEScan paired-end reads that did not contain the exact bar-  
 56 code and linker sequences were discarded. The first 6 bases of the CAGEScan reads were trimmed,

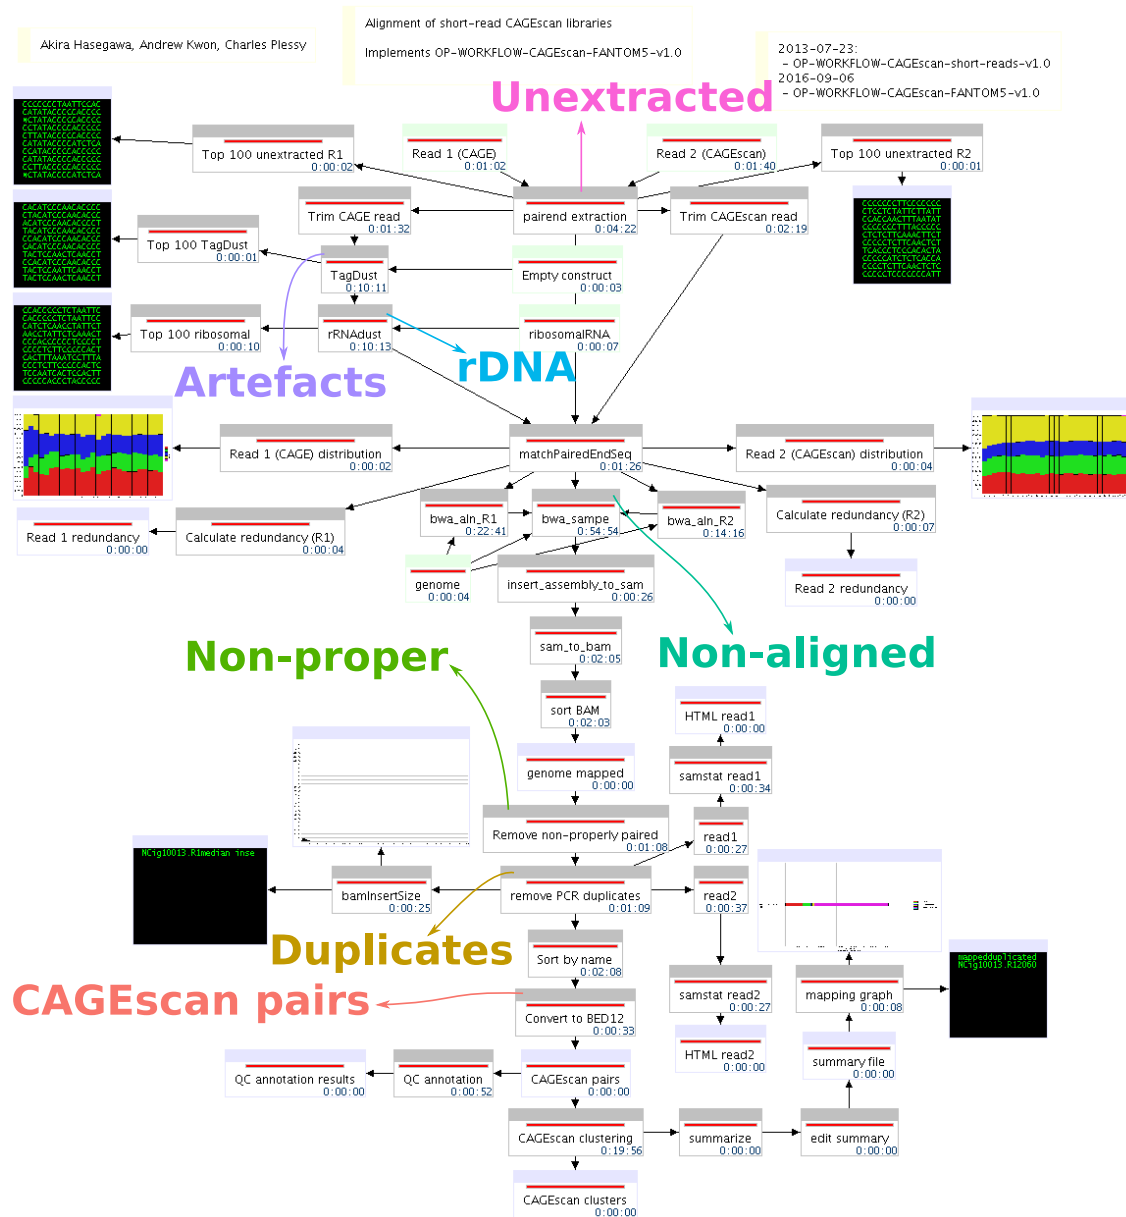

Figure 2: Processing pipeline. The diagram made of boxes connected by black arrows displays the MOIRAI workflow completed for one (NCig10013) of the 62 CAGEscan libraries. The colored text and arrows overlaid on the diagram represents the points where the main alignment statistics are calculated to summarize the number of read pairs passing all the filters (CAGEscan pairs) or discarded at each step of the processing pipeline (Unextracted, rDNA, Artefacts, Non-aligned, Non-proper, Duplicates).

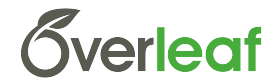

57 because they originate from the random primers and not the cDNAs, and therefore are prone to  
58 errors caused by mismatches during the hybridization to the RNAs, that are well tolerated by the  
59 reverse-transcriptase [14].

60 The CAGE and CAGEscan reads were then filtered independently with the TagDust program  
61 version 1.13 [15], using the sequences of empty constructs and primers as artifact library. They were  
62 then compared to reference sequences of ribosomal genes (GenBank: U13369.1) using the rRNA`dust`  
63 program version 1.03. Reads whose mates were discarded by these two filters were then removed.

64 FASTQ formatted cleaned paired-end reads were then aligned on the human genome version  
65 hg19 with BWA version 0.7.15 [16] using standard parameters, except that the maximum insert  
66 length (`-a`) was set to 2 Mbp to allow pairs to map on different exons, and that insert size detection  
67 was disabled (`-A`). Extra header records (for SQ: AS and for RG: CN, ID, LB, PU, SM, and PL)  
68 were added to ease processing and tracking. The resulting BWA SAM formatted alignments were  
69 then converted to BAM format, and unmapped as well as non-properly paired CAGE reads were  
70 discarded (flag `0x42`). The resulting "CAGEscan pairs" provide individual experimental information  
71 on the association of a single-nucleotide-resolution TSS with the body of a gene product.

72 The CAGEscan pairs were then converted to BED12 format using the program `pairedBamToBed12`  
73 version 1.2, in which the score field is the sum of the mapping qualities of each read of the pair.  
74 They were then assembled into CAGEscan clusters using the `CAGEscan-Clustering` script version  
75 1.2 and the Phase 1 + 2 FANTOM5 DPI CAGE peaks as seeds. The `CAGEscan-Clustering` script  
76 also takes advantage of the BED12 format, reporting the number of CAGEscan paired-end reads  
77 used to assemble each cluster via the score field and the name and position of the seeding CAGE  
78 peak via the name, `thickStart` and `thickEnd` fields respectively. Finally, the CAGEscan clusters from  
79 all libraries were then combined into a single global assembly of "meta-clusters" using the same  
80 program and output in BED12 files where the score indicates the number of libraries contributing  
81 data to each meta-cluster.

## 82 Code availability

83 The MOIRAI workflow template used to process the libraries is available as a supplemental XML file  
84 on Figshare (DOI: 10.6084/m9.figshare.4792666). MOIRAI enabled the design of a complete data  
85 processing pipeline based on the following softwares: FASTX-Toolkit ([http://hannonlab.cshl.edu/fastx\\_toolkit/](http://hannonlab.cshl.edu/fastx_toolkit/)),  
86 TagDust 1.13 [15], rRNA`dust` 1.03 ([http://fantom.gsc.riken.jp/5/sstar/Protocols:rRNA\\_dust](http://fantom.gsc.riken.jp/5/sstar/Protocols:rRNA_dust)) (note  
87 that for new projects, we recommend TagDust 2 instead of TagDust 1 and rRNA`dust`), BWA 0.7.15-  
88 r1140 ([16]), SAMtools 0.1.19-44428cd ([17]), `pairedBAMtoBED12` 1.2 ([https://github.com/Population-  
89 Transcriptomics/pairedBamToBed12](https://github.com/Population-Transcriptomics/pairedBamToBed12), DOI: 10.6084/m9.figshare.4792672), `CAGEscan-Clustering.pl`  
90 1.2 (<https://github.com/nicolas-bertin/CAGEscan-Clustering>, DOI: 10.6084/m9.figshare.4792675)  
91 and `promexinstats.sh` for the annotation (see supplemental material). The software above and  
92 standard Unix tools are sufficient to re-implement the pipeline in a different workflow system.

## 93 Data Records

94 Each CAGEscan library is described with a Sample and Data Relationship Format (SDRF) record,  
95 together with the rest of the FANTOM5 data ([9]). For each library, raw sequences in FASTQ  
96 format, alignment data in BAM format (including unmapped reads), CAGEscan pairs in BED12  
97 format, CAGEscan clusters in BED12 format and alignment statistics in plain text tabulation-

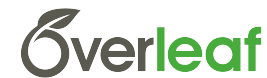

98 delimited triples (subject, predicate, object), are available in the FANTOM5 data repository. The  
99 raw sequences have also been deposited to DDBJ DRA (Data Citation 2).

## 100 Technical Validation

101 We derived individual library alignment statistics from the MOIRAI data processing pipeline (see  
102 Table 1 and Figures 2 and 3A). The statistics count the number of reads discarded at key steps  
103 of the processing. "Unextracted" are pairs where the linker was not found, "Artefacts" are pairs  
104 that matched the artifact library, or had a low complexity, "rDNA" are pairs that matched the  
105 reference rDNA locus (including rRNAs and their spacer regions), "Non-aligned" are pairs where  
106 one or both mates were not aligned to the genome, and "Non-proper" are pairs where the mates  
107 were not aligned in head-to-head orientation within 2 Mbp. "Duplicates" are the pairs removed  
108 during the deduplication step. That is, when there are  $n$  pairs with identical coordinates, 1 is kept  
109 and  $n - 1$  are discarded as "Duplicates". These statistics show that the amount of PCR duplicates  
110 was not larger than the number of CAGEscan pairs, suggesting that the libraries prepared in this  
111 study have not been fully exhausted by sequencing.

112 The library alignment statistics, as well as statistics describing the distribution of CAGEscan  
113 TSSs on GENCODE 19 annotations (Figure 3B), also suggest that the biological nature of the  
114 samples (cancer cell lines, primary cells, tissue samples and brain tissue) strongly influenced the  
115 performance of the CAGEscan protocol used in this study. Albeit displaying the best performance  
116 in terms of alignment (largest fraction of CAGEscan pairs), brain tissue derived samples had the  
117 lowest rate of known promoters overlapping start sites, hinting at a much greater diversity of  
118 alternative promoters usage in human brain. However, since, in this study, all brain tissue derived  
119 samples were taken from a single donor, this observation may result from technical batch effect  
120 rather than being a general feature of the nature of human brain transcriptome.

## 121 Usage Notes

122 We have seeded the CAGEscan clustering with FANTOM5 CAGE-defined core promoter regions,  
123 however alternative seeding strategies could be envisioned. The 5' ends of the CAGEscan pairs  
124 themselves could be clustered by peak calling and used as a seed, which is the default mode of oper-  
125 ation of the `pairedBamToBed12` tool. Foregoing the discovery of alternative promoters, CAGEscan  
126 clusters could also be seeded using promoter regions defined by GENCODE models. To discover  
127 potential enhancer-associated non-coding RNAs, region corresponding to FANTOM5 enhancers [18]  
128 could also be used.

129 We used a simple alignment strategy that did not take splicing into account. Thus, pairs  
130 overlapping splice junctions could not be mapped and CAGEscan clusters lack coverage at the  
131 beginning and end of each exon, but this only mildly impacts the main purpose of the method. In  
132 addition, since the CAGEscan pairs are anchored at the 5' end of the transcripts, splice junctions  
133 occurring close to the TSS may render some whole loci unmappable. Indeed, transcripts databases  
134 such as GENCODE reveal splice junctions very near to the TSS. Trimming the CAGE reads to 20  
135 nt rescued some loci, but other loci were lost due to the decrease of alignment stringency (data not  
136 shown). Thus, the development of a spliced alignment workflow would increase the accuracy of our  
137 method.

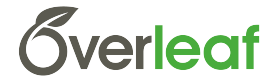

## A: alignment statistics

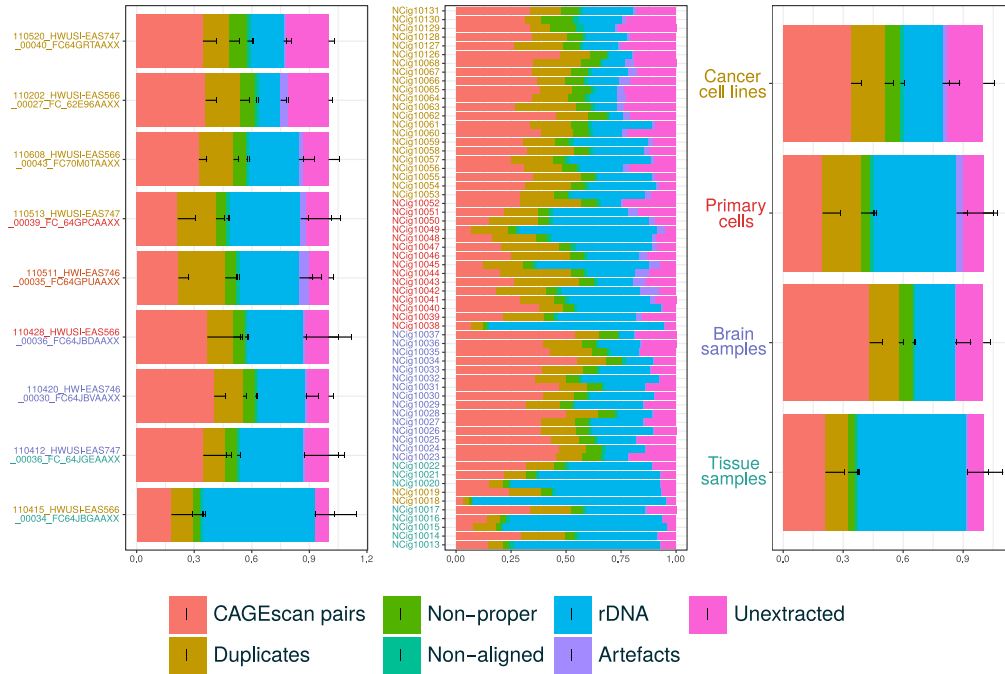

## B: annotation statistics

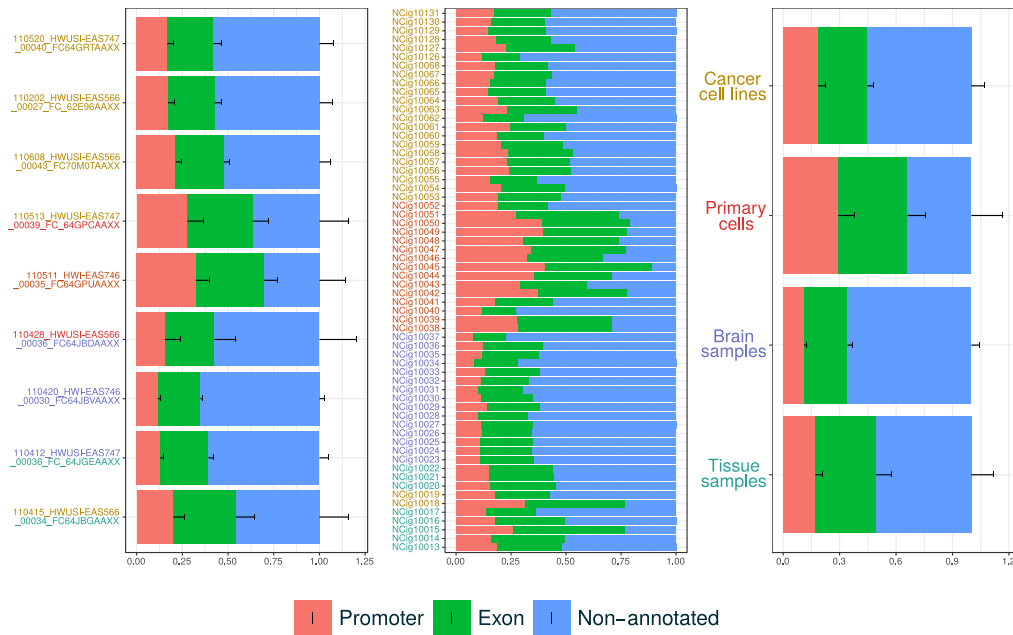

Figure 3: Quality control statistics. A: Fraction of pairs passing all filters (CAGEscan pairs) or discarded at key steps of the processing pipeline (see Figure 2). The central block of stack bars represents each library individually. The left block aggregates them by sequencing batch, named by the sequencing run identifier. The right block aggregates the libraries by sample type. Each sample type is represented by one color, that is also used to color the library identifiers and the sequence identifiers in the other blocks. Batches comprising multiple types are indicated by multiple colors. B: Fraction of pairs starting in a Promoter, Exon, or Other (non-promoter, non-exon) region.





138 One of the most striking differences between the HeliScopeCAGE-based FANTOM5 CAGE  
139 data and the nanoCAGE-based FANTOM5 CAGEscan data is a larger amount of start sites in  
140 the gene body, far from the promoter. This can be explained by the lower stringency of the  
141 nanoCAGE protocol, which uses template-switching for capturing 5' ends from limiting amounts of  
142 samples [6], where the HeliScopeCAGE protocol, that uses CAP Trapper [19], would not be possible.  
143 Readers curious about the position of the random priming site, indicated by the end position of the  
144 CAGEscan pairs, will notice that their distribution is very far from random. Control experiments  
145 performed using different batches of random primers ordered by different makers confirmed that  
146 the quality of the oligonucleotides was not in question (data not shown). In the latest version of  
147 the nanoCAGE protocol [20], this problem was solved by the fragmentation of the cDNAs by the  
148 "tagmentation" method. Altogether, we recommend to use our latest protocol for making new  
149 libraries.

150 In this study, the CAGEscan libraries were prepared using the nanoCAGE method, but the  
151 CAGEscan workflow, which can use any paired-end sequencing of CAGE libraries where the 3'  
152 sequencing read is at a random position in the cDNA, can be applied to other publicly available  
153 dataset, for instance made with the RAMPAGE method [21].

## 154 Acknowledgments

155 FANTOM5 was made possible by research grants for the RIKEN Omics Science Center and the  
156 Innovative Cell Biology by Innovative Technology (Cell Innovation Program) from the MEXT to  
157 Y.H. It was also supported by research grants for the RIKEN Preventive Medicine and Diagnosis  
158 Innovation Program (RIKEN PMI) to Y.H. and the RIKEN Centre for Life Science Technologies,  
159 Division of Genomic Technologies (RIKEN CLST (DGT)) from the MEXT, Japan. A.R.R.F. is  
160 supported by a Senior Cancer Research Fellowship from the Cancer Research Trust, the MACA  
161 Ride to Conquer Cancer and the Australian Research Council's Discovery Projects funding scheme  
162 (DP160101960). We thank RIKEN GeNAS for generation of the CAGEscan libraries, the Nether-  
163 lands Brain Bank for brain materials, and the RIKEN BioResource Centre for providing cell lines.

## 164 Competing financial interests

165 The author(s) declare no competing financial interests.

## 166 References

- 167 [1] Shiraki, T. *et al.* Cap analysis gene expression for high-throughput analy-  
168 sis of transcriptional starting point and identification of promoter usage. *Pro-*  
169 *ceedings of the National Academy of Sciences* **100**, 15776–15781 (2003). URL  
170 <http://www.pnas.org/cgi/doi/10.1073/pnas.2136655100>.
- 171 [2] Carninci, P. *et al.* Genome-wide analysis of mammalian promoter architecture and evolution.  
172 *Nature Genetics* **38**, 626–635 (2006).
- 173 [3] Forrest, A. R. R. *et al.* A promoter-level mammalian expression atlas. *Nature* **507**, 462–470  
174 (2014). URL <http://www.nature.com/doi/10.1038/nature13182>.



- 175 [4] Arner, E. *et al.* Transcribed enhancers lead waves of coordinated transcrip-  
176 tion in transitioning mammalian cells. *Science* **347**, 1010–1014 (2015). URL  
177 <http://www.sciencemag.org/cgi/doi/10.1126/science.1259418>.
- 178 [5] Noguchi, S. & consortium, T. F. FANTOM5 CAGE profiles of human and mouse samples  
179 (2017).
- 180 [6] Plessy, C. *et al.* Linking promoters to functional transcripts in small samples with nanoCAGE  
181 and CAGEscan. *Nature Methods* **7**, 528–534 (2010).
- 182 [7] Kratz, A. *et al.* Digital expression profiling of the compartmentalized transcriptome of Purkinje  
183 neurons. *Genome Research* **24**, 1396–1410 (2014).
- 184 [8] Severin, J. *et al.* Interactive visualization and analysis of large-scale sequencing datasets using  
185 ZENBU. *Nature Biotechnology* **32**, 217–219 (2014).
- 186 [9] Lizio, M. *et al.* Gateways to the FANTOM5 promoter level mammalian expression atlas.  
187 *Genome Biology* **16**, 22 (2015).
- 188 [10] Abugessaisa, I. *et al.* FANTOM5 transcriptome catalog of cellular states based on Semantic  
189 MediaWiki. *Database: The Journal of Biological Databases and Curation* **2016** (2016).
- 190 [11] Salimullah, M., Sakai, M., Mizuho, S., Plessy, C. & Carninci, P. NanoCAGE: a high-resolution  
191 technique to discover and interrogate cell transcriptomes. *Cold Spring Harbor Protocols* **2011**,  
192 [pdb.prot5559](http://pdb.prot5559) (2011).
- 193 [12] Tang, D. T. P. *et al.* Suppression of artifacts and barcode bias in high-throughput transcrip-  
194 tome analyses utilizing template switching. *Nucleic Acids Research* **41**, e44–e44 (2013). URL  
195 <http://nar.oxfordjournals.org/lookup/doi/10.1093/nar/gks1128>.
- 196 [13] Hasegawa, A., Daub, C., Carninci, P., Hayashizaki, Y. & Lassmann, T. MOIRAI: a compact  
197 workflow system for CAGE analysis. *BMC bioinformatics* **15**, 144 (2014).
- 198 [14] Mizuno, Y. *et al.* Increased specificity of reverse transcription priming by trehalose and oligo-  
199 blockers allows high-efficiency window separation of mRNA display. *Nucleic Acids Research*  
200 **27**, 1345–1349 (1999).
- 201 [15] Lassmann, T., Hayashizaki, Y. & Daub, C. O. TagDust—a program to eliminate artifacts from  
202 next generation sequencing data. *Bioinformatics (Oxford, England)* **25**, 2839–2840 (2009).
- 203 [16] Li, H. & Durbin, R. Fast and accurate short read alignment with Burrows-Wheeler transform.  
204 *Bioinformatics (Oxford, England)* **25**, 1754–1760 (2009).
- 205 [17] Li, H. *et al.* The Sequence Alignment/Map format and SAMtools. *Bioinformatics (Oxford,*  
206 *England)* **25**, 2078–2079 (2009).
- 207 [18] Andersson, R. *et al.* An atlas of active enhancers across human cell types and tissues. *Nature*  
208 **507**, 455–461 (2014).
- 209 [19] Kanamori-Katayama, M. *et al.* Unamplified cap analysis of gene expression on a single-molecule  
210 sequencer. *Genome Research* **21**, 1150–1159 (2011).

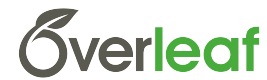

- 211 [20] Poulain, S. *et al.* NanoCAGE: A Method for the Analysis of Coding and Noncoding 5'-Capped  
212 Transcriptomes. *Methods in Molecular Biology (Clifton, N.J.)* **1543**, 57–109 (2017).
- 213 [21] Batut, P., Dobin, A., Plessy, C., Carninci, P. & Gingeras, T. R. High-fidelity promoter profil-  
214 ing reveals widespread alternative promoter usage and transposon-driven developmental gene  
215 expression. *Genome Research* **23**, 169–180 (2013).

## 216 Data Citations

- 217 1. FANTOM5 CAGEscan view on the ZENBU genome browser:  
218 <http://fantom.gsc.riken.jp/zenbu/gLyphs/#config=ZkJi4RdBAFhnsudxePrZxD>
- 219 2. DDBJ Sequence Read Archive, DRA005606 (2017).
